# Supplementary material for: F-actin organization and target constriction during primary macrophage phagocytosis is balanced by competing activity of myosin-I and myosin-II
Source: PubMed Central journal article supplement — Mol Biol Cell. 2022 Nov 18;33(14):br24. doi: 10.1091/mbc.E22-06-0210 (PMC9727803; doi:10.1091/mbc.e22-06-0210), 2022-11-18
Supplement: mbc-33-br24-s001.pdf [file mbc-33-br24-s001.pdf]

Supplementary Materials

*Molecular Biology of the Cell*

Barger *et al.*

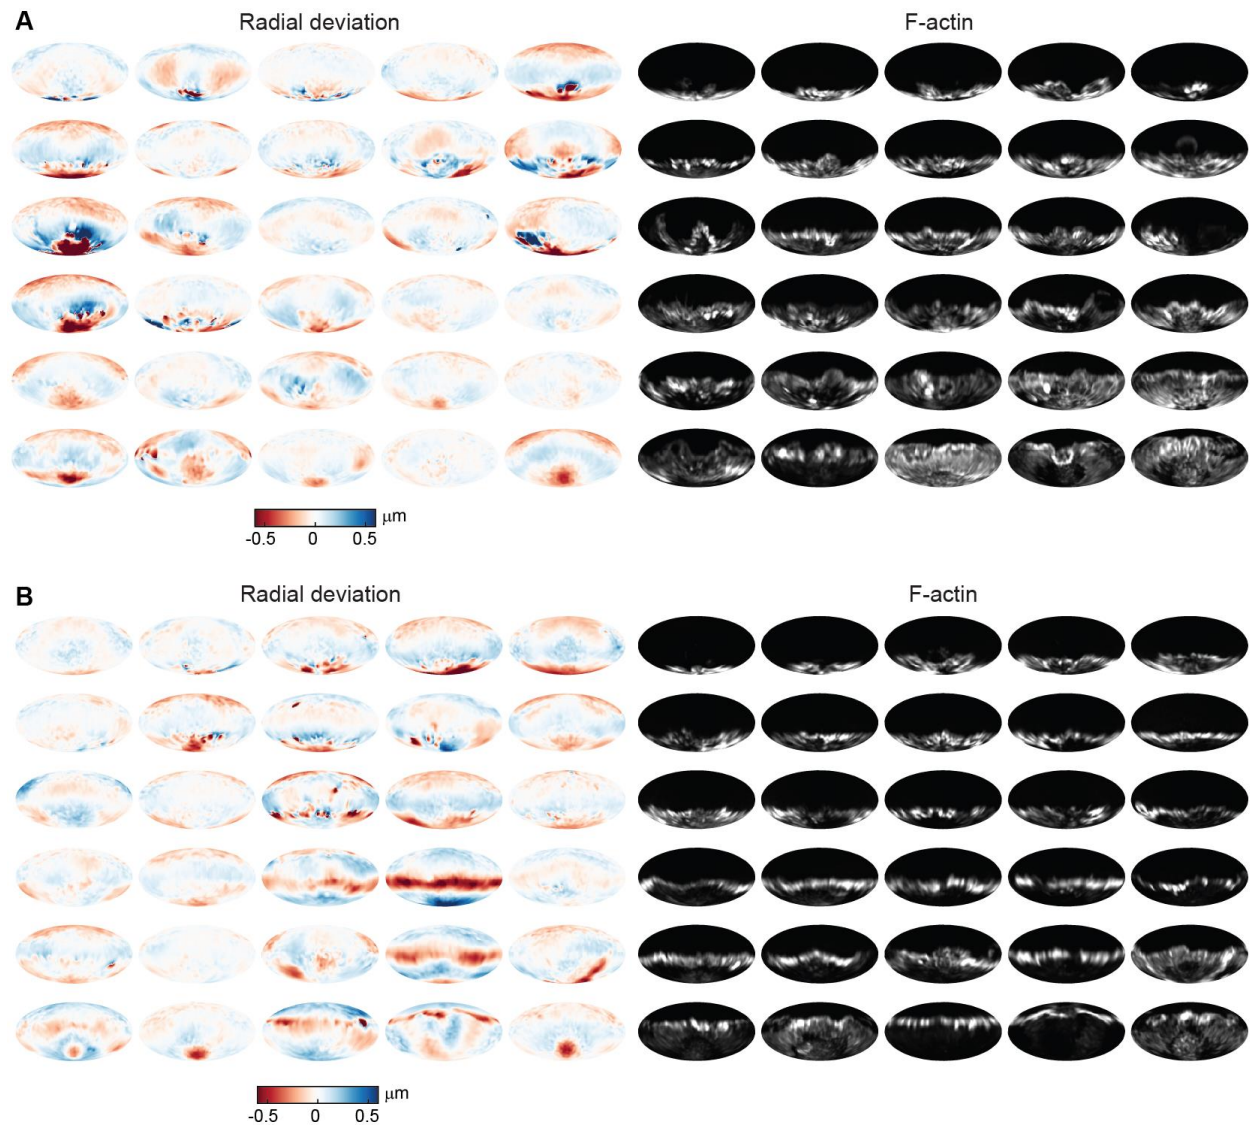

**Supplemental Figure 1: Visualization of deformations and F-actin intensity for all WT and Myosin Ie/f dKO events.** (A) The 30 phagocytic events by WT bone marrow-derived macrophages (BMDMs) used in this manuscript are shown using Mollweide projections. The particles are sorted by phagocytic stage, with the upper left the lowest percentage of the particle surface area engulfed and the bottom right the highest percentage. (B) Similar to A, but for Myosin Ie/f dKO BMDMs.
